# Supplementary material for: Myosin II regulation duringC. elegansembryonic elongation:LET-502/ROCK, MRCK-1 and PAK-1, three kinases with different roles
Source: Oxford University Press journal article supplement (doi:10.1242/dev.039412), 2009-08-13
Supplement: dev039412tables1.pdf [file dev039412tables1.pdf]

**Table S1. Genes and associated RNAi phenotypes for candidates obtained in the RNAi screen for elongation or cytoskeleton defects**

| Category                       | Transcript | Gene name      | Function                            | Phenotype*                                                  | Penetrance <sup>†</sup> |
|--------------------------------|------------|----------------|-------------------------------------|-------------------------------------------------------------|-------------------------|
| <b>Cytoskeleton associated</b> | T12D8.6    | <i>mlc-5</i>   | Myosin essential light chain        | No cytokinesis, arrest at 1.2-fold                          | 100%                    |
|                                | Y66H1B.3   | <i>filamin</i> | Cytoskeletal crosslinker            | BMD, arrest before 2-fold, disorganised cytoskeleton        | 25%                     |
|                                | W07B3.2    | <i>gei-4</i>   | Regulator of intermediate filaments | BMD, arrest before 2-fold                                   | 20%                     |
| <b>Trafficking</b>             | C56C10.3   | <i>vps-32</i>  | Protein sorting                     | BMD, arrest before 1.5-fold, defects in seam cell alignment | 100%                    |
|                                | ZC518.2    | <i>sec-24</i>  | ER-to-Golgi transport               | Arrest before 2-fold                                        | 60%                     |
| <b>Unknown</b>                 | F33H1.3    |                |                                     | BMD, arrest before 2-fold                                   | 40%                     |
|                                | R08D7.2    |                |                                     | BMD, arrest before 1.5-fold                                 | 20%                     |

\*Phenotype observed after RNAi feeding on *rrf-3(pk1426)* background.

<sup>†</sup>Percentage of embryos displaying the described phenotype.

BMD, body morphology defects.
