# Supplementary material for: Myosin II regulation duringC. elegansembryonic elongation:LET-502/ROCK, MRCK-1 and PAK-1, three kinases with different roles
Source: Oxford University Press journal article supplement (doi:10.1242/dev.039412), 2009-08-13
Supplement: dev039412tables2.pdf [file dev039412tables2.pdf]

**Table S2. RNAi phenotype of potential myosin light chain kinases in a *let-502* mutant background**

| Genotype                              | Human ortholog                    | Elongation arrest at 25.5°C* | Penetrance <sup>†</sup> |
|---------------------------------------|-----------------------------------|------------------------------|-------------------------|
| N2                                    |                                   | No                           | 98%                     |
| <i>let-502(sb118ts)</i>               |                                   | 2-fold                       | 98%                     |
| <i>let-502(sb118ts);spk-1(RNAi)</i>   | SR-protein-specific kinase 1      | 2-fold                       | 90%                     |
| <i>slet-502(sb118ts);dapk-1(RNAi)</i> | Death-associated protein kinase 1 | 2-fold                       | 91%                     |
| <i>let-502(sb118ts);aak-1(RNAi)</i>   | AMPK alpha-1 chain                | 2-fold                       | 95%                     |
| <i>let-502(sb118ts);aak-2(RNAi)</i>   | AMPK alpha-2 chain                | 2-fold                       | 94%                     |
| <i>let-502(sb118ts);gck-1(RNAi)</i>   | STE20-like kinase                 | 2-fold                       | 95%                     |
| <i>let-502(sb118ts);gck-2(RNAi)</i>   | MEKKK 5                           | 2-fold                       | 92%                     |
| <i>let-502(sb118ts);mig-15(RNAi)</i>  | MEKKK 4                           | 2-fold                       | 95%                     |
| <i>let-502(sb118ts);ZC373.4(RNAi)</i> | MLCK                              | 2-fold                       | 83%                     |
| <i>let-502(sb118ts);mrck-1(RNAi)</i>  | MRCK                              | 1.2-fold                     | 90%                     |
| <i>let-502(sb118ts);pak-1(RNAi)</i>   | p21-activated kinase 1            | 1.2-fold                     | 98%                     |

\*N2 and *let-502(sb118ts)* young adults were injected with double-stranded RNA and subsequently stored at 25.5°C overnight. Synchronized embryos (8-10 hours after egg laying) were observed 24 hours after injection. N2 did not show any major embryonic elongation defect.

<sup>†</sup>Penetrance corresponds to the percentage of embryos showing the described embryonic elongation arrest\*. Other phenotypes were observed (i.e. early embryonic arrest) but are not mentioned in this table. For each genotype,  $n \geq 40$  embryos.
